# Supplementary material
Source: publisher site journal article supplement (https://vertebrate-zoology.arphahub.com/article/87313/download/suppl/31/)
Supplement: Supplementary file 1

**Table S1.** Partitions and evolutionary models for the concatenated alignment obtained using Model Finder (MF) and bModelTest (bMT).

| Partition | Position | MF | bMT |
| --- | --- | --- | --- |
| nd4_1, nd4_trnas, cytb_1 | 1-693\3, 694-843, 844-1616\3 | TN+F+G4 | 123141 |
| nd4_2, cytb_2 | 2-693\3, 845-1616\3 | HKY+F+I | 123123 |
| nd4_3, cytb_3 | 3-693\3, 846-1616\3 | TN+F+G4 | 121134 |
